# Supplementary material for: Hierarchically structured Fe3O4microspheres: morphology control and their application in wastewater treatment
Source: Royal Society of Chemistry journal article supplement (doi:10.1039/c0ce00217h), 2010-09-27
Supplement: c0ce00217h.pdf [file c0ce00217h.pdf]

# **Hierarchically Structured Fe<sub>3</sub>O<sub>4</sub> Microspheres: Morphology Control and Its Application in Water Treatment**

Xiyan Li, Zhenjun Si, Yongqian Lei, Xiaona Li, Jinkui Tang, Shuyan Song and

Hongjie Zhang\*

State Key Laboratory of Rare Earth Resource Utilization, Changchun Institute of Applied Chemistry, Chinese Academy of Sciences, Graduate School of the Chinese Academy of Sciences, Changchun, 130022, Jilin, China.

\* To whom correspondence should be addressed. E-mail: [hongjie@ciac.jl.cn](mailto:hongjie@ciac.jl.cn). Fax: +86-431-85698041. Tel: +86-431-85262127.

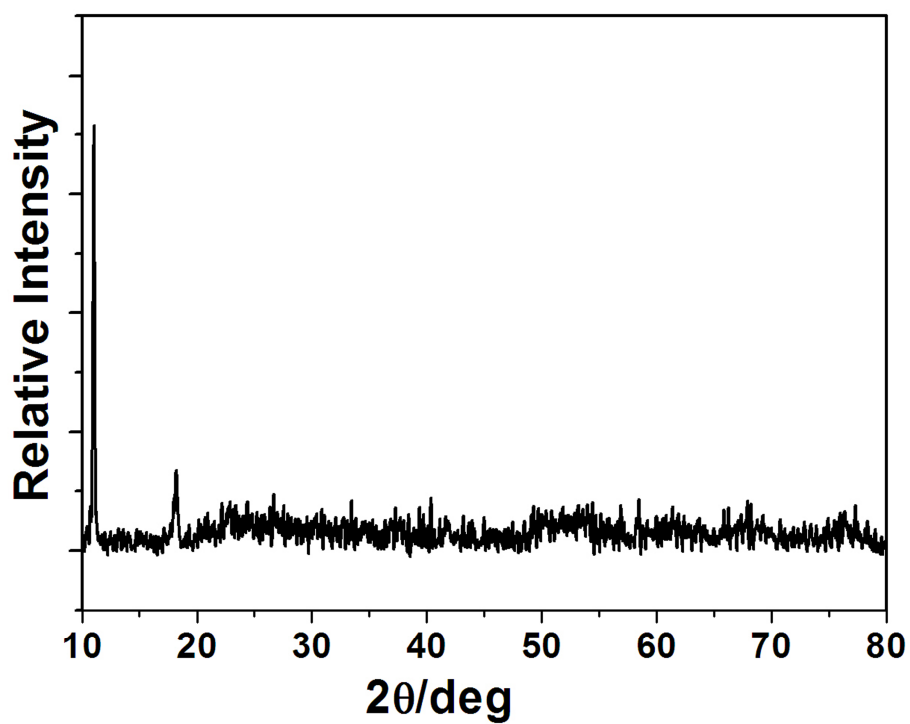

Fig. S1. XRD pattern of the precursor.

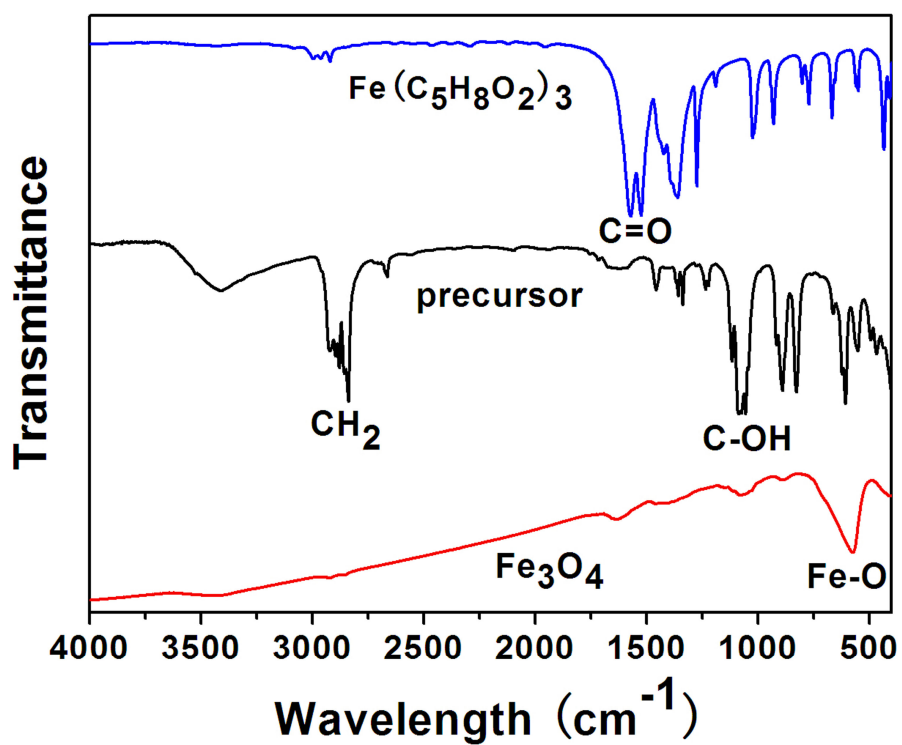

Fig. S2. IR spectra taken from KBr pellets that contained the starting material ( $\text{Fe}(\text{acac})_3$ ) and iron oxide precursor before and after calcinations.

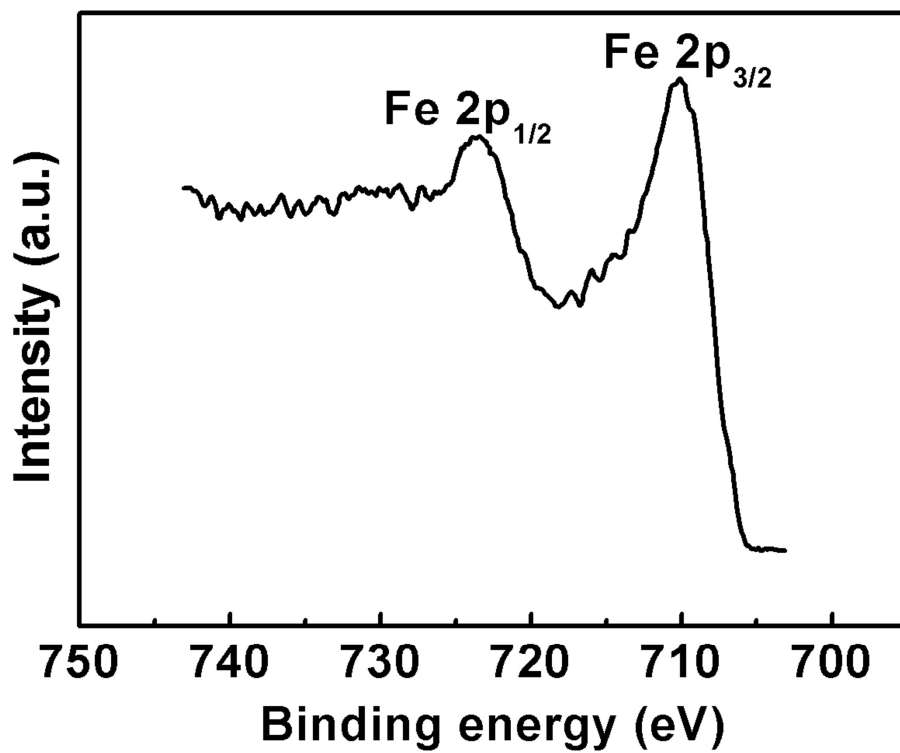

Fig. S3. XPS spectra of the precursor.

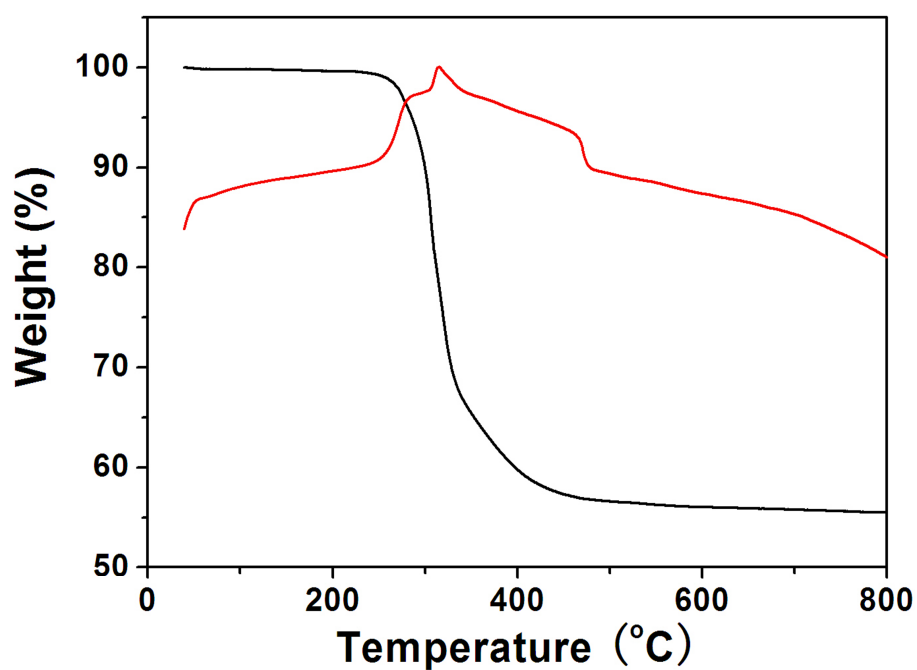

Fig. S4. TG (black line) and DTA (red line) curves of the precursor.

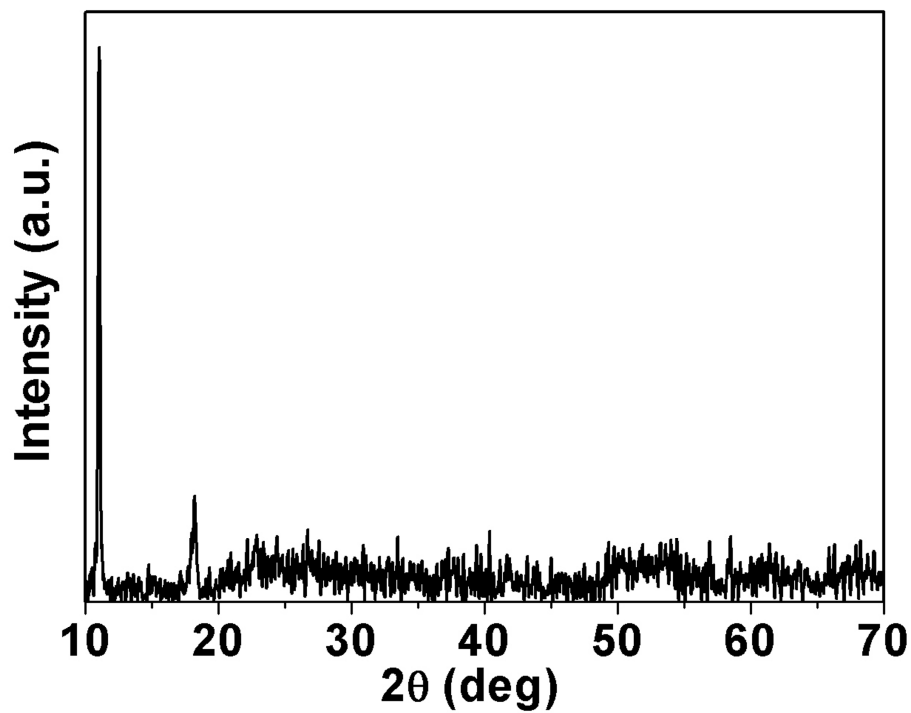

Fig. S5. XRD pattern of the products prepared with the amount of  $\text{NH}_4\text{Ac}$  (20 mmol).

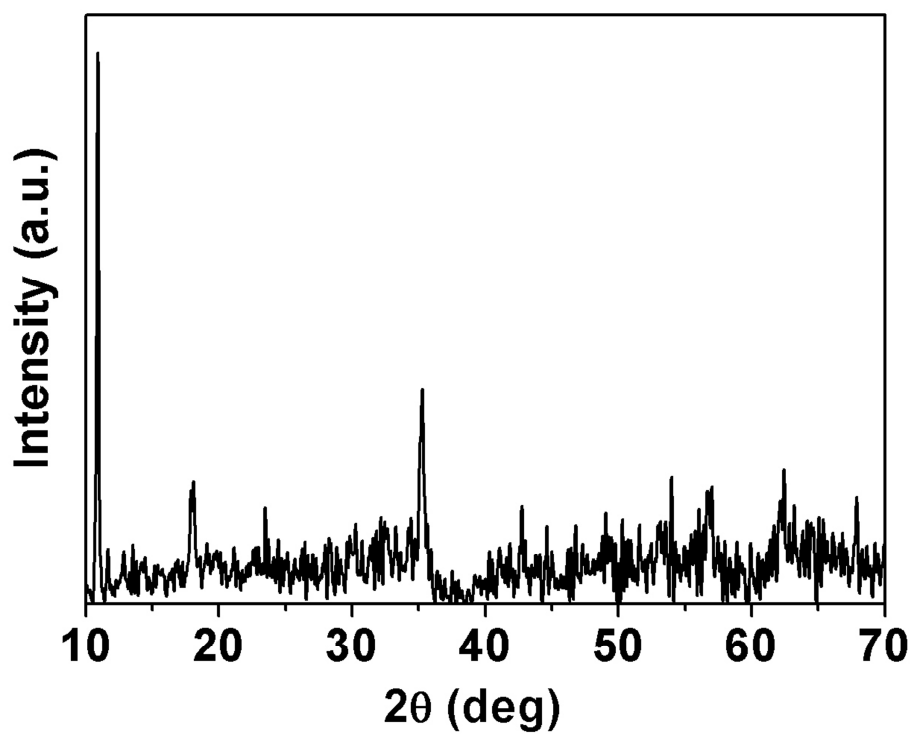

Fig. S6. XRD pattern of the products prepared with the amount of  $\text{NH}_4\text{Ac}$  (100 mmol).

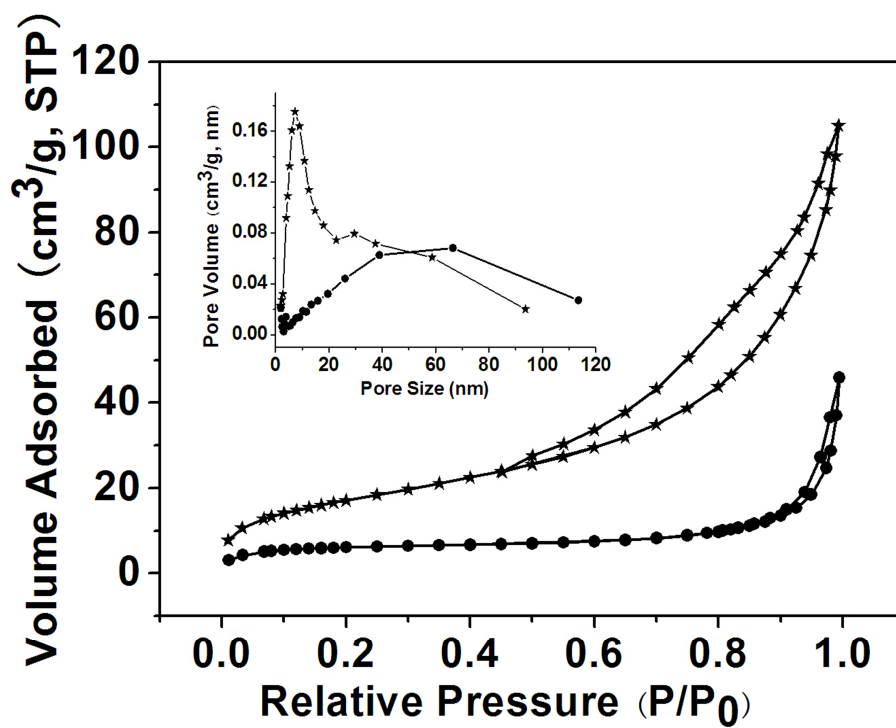

**Fig. S7.** Nitrogen adsorption/desorption isotherms and BJH pore plots (inset) of Fe<sub>3</sub>O<sub>4</sub> nanoparticle (62.55 m<sup>2</sup>/g) and the hollow microsphere precursors (19.74 m<sup>2</sup>/g).
